# Supplementary material
Source: PubMed Central journal article supplement (PMC5487618)
Supplement: AAC.02099-16_zac007176310s1.pdf [file AAC.02099-16_zac007176310s1.pdf]

Fig. S1

Human M $\phi$   
infected

Human M $\phi$  infected  
and treated

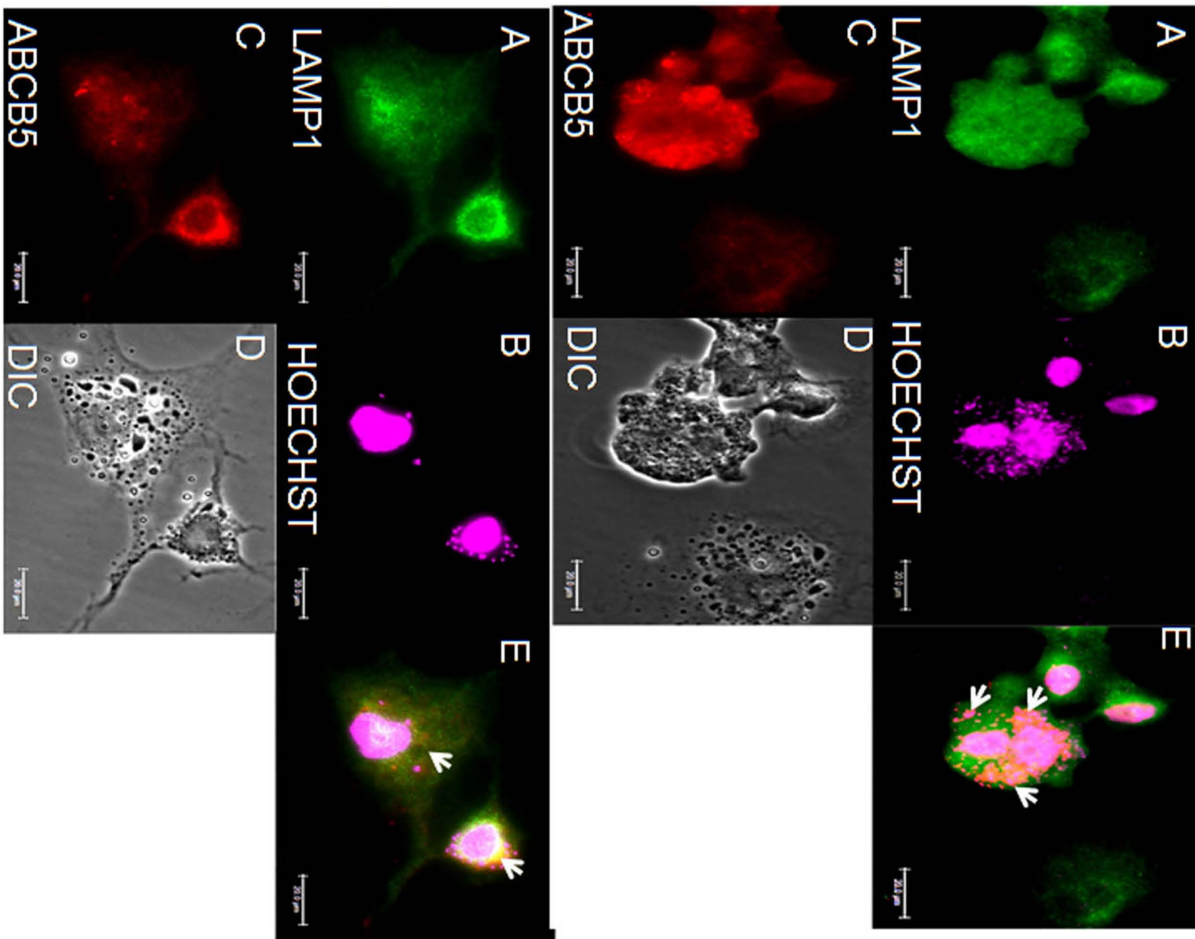

**Supplementary FIG. S1. Immunolocalization of ABCB5 by confocal laser microscopy in human macrophages.** Human MDMs infected with *Leishmania braziliensis* (Upper panel); human MDMs infected with *L. braziliensis* and treated with Glucantime (Bottom panel); A. LAMP1, marker for lysosomes and late endosomes. B. Nuclei of macrophages and parasites were stained with Hoechst (violet). C. Subcellular localization of ABCB5 drug transporter, D. DIC: differential interference contrast images of human macrophages cells, E. Merged Hoechst and Lamp1 and ABCB5 images. White arrow indicates the subcellular localization of ABCB5 in phagolysosomal structures.

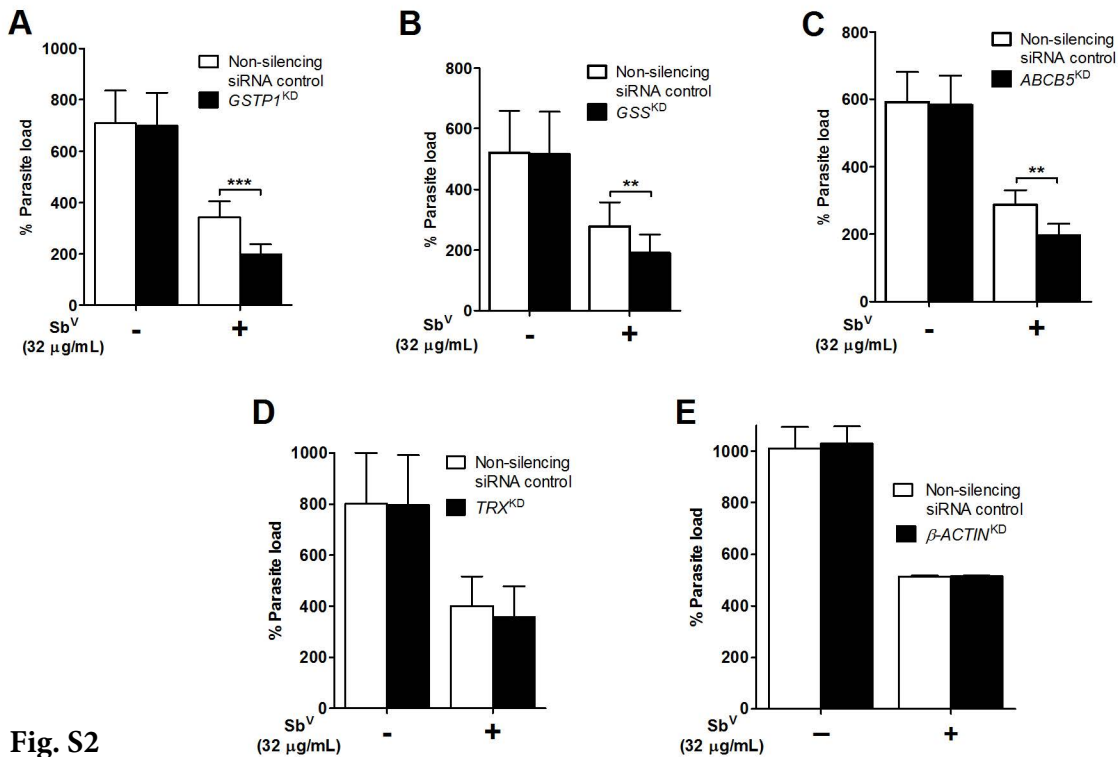

Fig. S2

**Supplementary FIG. S2. Silencing effect of *GSTP1*, *GSS*, *ABCB5*, *TRX* and  $\beta$ -*ACTIN* genes on intracellular *L. braziliensis* amastigote parasitic load in THP1 M $\Phi$  cells silenced and not silenced.** A = *GSTP1*, B = *GSS*, C = *ABCB5*, D = *TRX* and E =  $\beta$ -*ACTIN*. THP-1 M $\Phi$  cells were treated with Sb<sup>V</sup> (32  $\mu$ g/mL); THP-1 M $\Phi$  cells infected and not treated were used as controls. The results represent the average of 2-3 independent experiments  $\pm$  SE. Significant differences were determined by two-way ANOVA, followed by multiple comparison test of Bonferroni, \*\*  $P < 0.01$  and \*\*\*  $P < 0.001$ .

**A**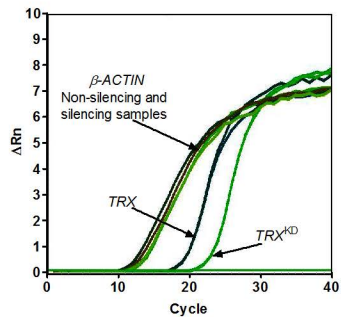**ii**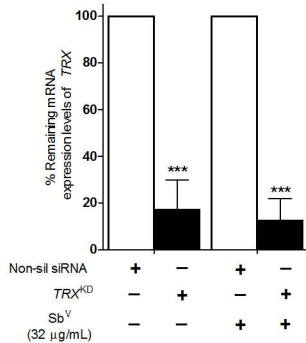**B**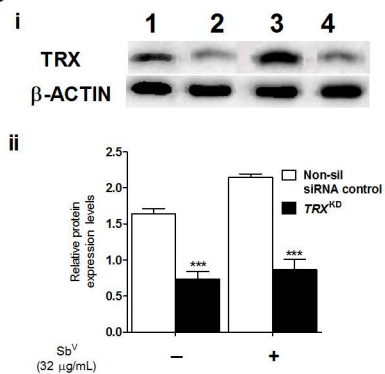**C**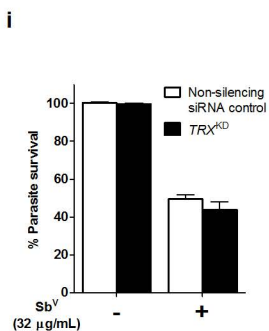**ii**  $Sb^V$  (32  $\mu$ g/mL)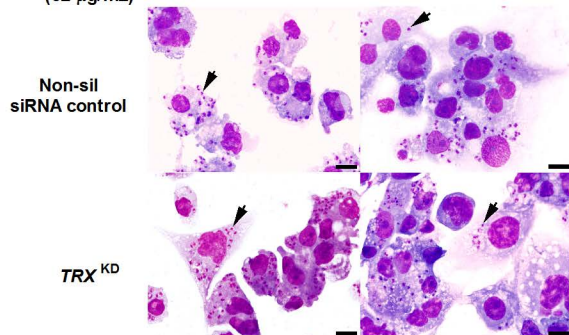**Fig. S3**

**Supplementary FIG. S3. Silencing of the human *TRX* gene increased the intracellular susceptibility of *L. braziliensis* amastigotes to Sb<sup>V</sup> treatment in THP1 human MΦ cells.** **A.** Efficacy of *TRX* gene silencing was determined at the mRNA expression level by real-time PCR analyses. (i) Representative amplification plot of *TRX* and  $\beta$ -*ACTIN* genes showing the  $\Delta R_n$  vs the cycles observed in the THP-1 MΦ cells infected with *L. braziliensis* and treated with Sb<sup>V</sup>. (ii) Percentage of the remaining levels of mRNA expression in the THP-1 MΦ infected and infected and treated groups (non-silencing siRNA negative control and silenced samples). **Bi.** Protein expression analyses by western blotting; equivalent protein loading was assessed by immunodetection of  $\beta$ -*ACTIN*. Line 1: THP-1 MΦ cells transfected with non-silencing siRNA negative control and infected. Line 2: THP-1 MΦ cells transfected with *TRX* siRNA (*TRX*<sup>KD</sup>) and infected. Line 3: THP-1 MΦ cells transfected with non-silencing siRNA, infected and treated with Sb<sup>V</sup> (32  $\mu$ g/mL). Line 4: THP-1 MΦ cells transfected with *TRX* siRNA (*TRX*<sup>KD</sup>), infected and treated with Sb<sup>V</sup>. **Bii.** Densitometric analysis of signals shown in panel Bi was carried out with ImageJ software. **Ci.** Percentage of intracellular survival of *L. braziliensis* amastigotes infecting THP-1 MΦ cells transfected with non-silencing siRNA or *TRX* siRNA (*TRX*<sup>KD</sup>) and treated with Sb<sup>V</sup> (32  $\mu$ g/mL); infected and untreated THP-1 MΦ were used as controls. **Cii.** Photomicrographs of human THP-1 MΦ cells containing amastigotes (arrow) transfected with non-silencing or *TRX*<sup>KD</sup> and treated or not with 32  $\mu$ g/mL of Sb<sup>V</sup>. (Giemsa stain; scale bar = 20  $\mu$ m). The results represent the average of two to three independent experiments + SEM. Significant differences were determined by two-way ANOVA, followed by Bonferroni's Multiple Comparison Test, \*\*\*  $P < 0.01$ .

**A**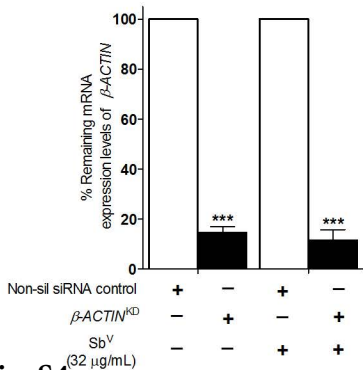**B i**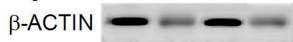**ii**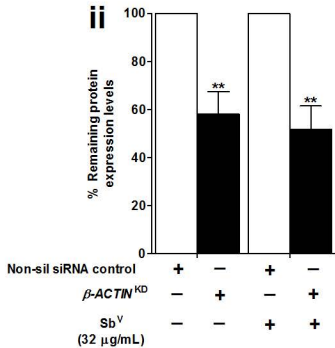**C**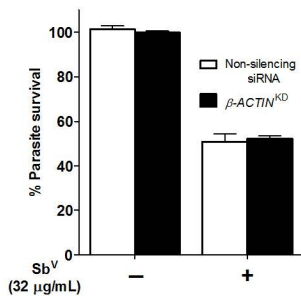**Fig. S4**

**Supplementary FIG. S4. Silencing of the human  $\beta$ -ACTIN gene did not increase the intracellular susceptibility of *L. braziliensis* amastigotes to Sb<sup>V</sup> treatment in THP1 human M $\Phi$  cells.** Efficacy of  $\beta$ -ACTIN gene silencing was determined at the mRNA and protein expression levels by real-time PCR and western blotting analyses, respectively. A. Percentage of the remaining levels of mRNA expression in the THP-1 M $\Phi$  infected and infected and treated groups (non-silencing siRNA negative control and silenced samples). Bi = Remaining levels of protein expression. Line 1 = THP-1 M $\Phi$  transfected with non-silencing siRNA and infected with *L. braziliensis* (negative control). Line 2 = THP-1 M $\Phi$  cells transfected with  $\beta$ -ACTIN siRNA ( $\beta$ -ACTIN<sup>KD</sup>) and infected. Line 3 = THP-1 M $\Phi$  cells transfected with non-silencing siRNA, infected and treated with Sb<sup>V</sup> (32  $\mu$ g/mL). Line 4 = THP-1 M $\Phi$  cells transfected with  $\beta$ -ACTIN siRNA ( $\beta$ -ACTIN<sup>KD</sup>), infected and treated with Sb<sup>V</sup>. Bii = Densitometric analysis of the signals shown in panel Bi using the software ImageJ. C = Percentage of intracellular survival of *L. braziliensis* amastigotes infecting THP-1 M $\Phi$  cells transfected with non-silencing siRNA or  $\beta$ -ACTIN<sup>KD</sup> and treated with Sb<sup>V</sup> (32  $\mu$ g/mL); infected and untreated THP-1 M $\Phi$  cells were used as controls. The results represent the average of two to three independent experiments + SEM. Significant differences were determined by two-way ANOVA, followed by Bonferroni's Multiple Comparison Test, \*\*  $P < 0.01$  and \*\*\*  $P < 0.01$ .



Supplementary Table S1. Sequences of siRNA genes involved in the antioxidant defense used for the gene-inhibition assays.

| siRNA name                          | Gene      | Gene symbol                    | 5'-3' target sequence  | 5'-3' sense strand     | 5'-3' antisense strand |
|-------------------------------------|-----------|--------------------------------|------------------------|------------------------|------------------------|
| HsACTB6                             | NM_001101 | <i>ACTB</i>                    | CGCCGCGCTCGTCGTCGACAA  | CCGCGCUCGUCGUCGACAATT  | UUGUCGACGACGAGCGCGGCG  |
| HsTRX_1                             | NM_003329 | <i>TRX</i>                     | CACCATTAATGAATTAGTCTA  | CCAUUAUGAAUUAGUCUATT   | UAGACUAAUUCAUUAAUGGTG  |
| HsTRX_2                             | NM_003329 | <i>TRX</i>                     | AACCAGCCATTGGCTATTTAA  | CCAGCCAUUGGCUAUUUAAATT | UUAAAUAGCCAAUGGCUGGTT  |
| HsTRX_3                             | NM_003329 | <i>TRX</i>                     | TGCCATCTGCGTGACAATAAA  | CCAUCUGCGUGACAAUAAATT  | UUUAAUUGUCACGCAGAUGGCA |
| HsGSTP1_1                           | NM_000852 | <i>GSTP1</i>                   | AAGGATGACTATGTGAAGGCA  | GGAUGACUAUGUGAAGGCATT  | UGCCUUCACAUAGUCAUCCTT  |
| HsGSTP1_2                           | NM_000852 | <i>GSTP1</i>                   | CCAGATCTCCTTCGCTGACTA  | AGAUCUCCUUCGCUGACUATT  | UAGUCAGCGAAGGAGAUCUGG  |
| HsGSTP1_7                           | NM_000852 | <i>GSTP1</i>                   | CCCATCAATGGCAACGGGAAA  | CAUCA AUGGCAACGGGAAATT | UUUCCCGUUGCCAUUGAUGGG  |
| HsGSS_1                             | NM_000178 | <i>GSS</i>                     | TCCGACGAACATTTGAAGATA  | CGACGAACA UUGAAGAUATT  | UAUCUUCAAAUGUUCGUCGGA  |
| HsGSS_2                             | NM_000178 | <i>GSS</i>                     | CTGGTGCTACTGATTGCTCAA  | GGUGCUACUGAUUGCUCUATT  | UUGAGCAAUCAGUAGCACCAG  |
| HsGSS_8                             | NM_000178 | <i>GSS</i>                     | TTGGGATAGGACTGAGTGGTA  | GGGAUAGGACUGAGUGGUATT  | UACCACUCAGUCCUAUCCCAA  |
| HsABCB5_9                           | NM_178559 | <i>ABCB5</i>                   | TTTGATGTTCTGTGTAATGCAA | UGAUGUUCGUGUAAUGCAATT  | UUGCAUUAACACGAACAUCAAA |
| HsABCB5_12                          | NM_178559 | <i>ABCB5</i>                   | GAGAATGACATCAGAGCTTTA  | GAAUGACAUCAGAGCUUUATT  | UAAAGCUCUGAUGUCAUUCTC  |
| HsABCB5_14                          | NM_178559 | <i>ABCB5</i>                   | CAGAGGTTATATGATCCGGAT  | GAGGUUAUAUGAACCGGAUTT  | AUCCGGAUCAUUAACCUCTG   |
| Allstars AF 488<br>Negative control | Not apply | DSsiRNA<br>control<br>sequence | Not apply              | QIAGEN Property        | QIAGEN Property        |

Supplementary Table S2. Modulation of Oxidative Stress gene expression levels in human MDMs cells by *L. braziliensis* infection and Glucantime® (Sb<sup>V</sup>) treatment<sup>a</sup>.

| Refseq    | Symbol        | Description Oxidative Stress                                   | Fold change gene expression |                |                 |                  |                                               |                  |
|-----------|---------------|----------------------------------------------------------------|-----------------------------|----------------|-----------------|------------------|-----------------------------------------------|------------------|
|           |               |                                                                | <i>L. braziliensis</i>      | <i>p value</i> | Sb <sup>V</sup> | <i>p value</i>   | <i>L. braziliensis</i><br>and Sb <sup>V</sup> | <i>p value</i>   |
| NM_000477 | <i>ALB</i>    | Albumin                                                        | 1.4773                      | 0.47           | 1.695           | 0.48             | 2.4182                                        | 0.25             |
| NM_000697 | <i>ALOX12</i> | Arachidonate 12-lipoxygenase                                   | 2.081                       | 0.25           | -1.0475         | 0.88             | <b>3.6403</b>                                 | 0.24             |
| NM_001159 | <i>AOX1</i>   | Aldehyde oxidase 1                                             | -1.0513                     | 0.61           | 1.0163          | 0.47             | 1.1979                                        | 0.31             |
| NM_000041 | <i>APOE</i>   | Apolipoprotein E                                               | 2.7876                      | 0.80           | <b>6.461</b>    | 0.21             | <b>5.816</b>                                  | 0.32             |
| NM_004045 | <i>ATOX1</i>  | ATX1 antioxidant protein 1 homolog (yeast)                     | <b>3.6225</b>               | 0.23           | <b>4.4184</b>   | 0.05             | <b>4.1014</b>                                 | 0.29             |
| NM_004052 | <i>BNIP3</i>  | BCL2/adenovirus E1B 19kDa interacting protein 3                | <b>4.5989</b>               | 0.09           | <b>6.6093</b>   | <b>0.004</b>     | <b>4.987</b>                                  | 0.33             |
| NM_001752 | <i>CAT</i>    | Catalase                                                       | <b>3.3574</b>               | 0.12           | <b>8.0953</b>   | <b>&lt;0.001</b> | <b>5.0263</b>                                 | 0.28             |
| NM_002985 | <i>CCL5</i>   | Chemokine (C-C motif) ligand 5                                 | 1.529                       | 0.26           | 1.7075          | 0.24             | 1.3582                                        | 0.26             |
| NM_005125 | <i>CCS</i>    | Copper chaperone for superoxide dismutase                      | 1.9522                      | 0.42           | <b>3.5493</b>   | 0.093            | 2.0695                                        | 0.30             |
| NM_000397 | <i>CYBB</i>   | Cytochrome b-245, beta polypeptide                             | 2.863                       | <b>0.047</b>   | <b>3.3381</b>   | 0.084            | 1.3859                                        | 0.24             |
| NM_134268 | <i>CYGB</i>   | Cytoglobin                                                     | <b>3.1808</b>               | 0.96           | <b>6.3211</b>   | 0.29             | <b>5.1408</b>                                 | 0.35             |
| NM_014762 | <i>DHCR24</i> | 24-dehydrocholesterol reductase                                | 1.2843                      | 0.83           | 1.3273          | 0.52             | 1.2039                                        | 0.33             |
| NM_175940 | <i>DUOX1</i>  | Dual oxidase 1                                                 | -1.3039                     | 0.83           | -1.588          | 0.21             | 1.5295                                        | 0.32             |
| NM_014080 | <i>DUOX2</i>  | Dual oxidase 2                                                 | -2.4566                     | 0.26           | -1.346          | 0.33             | -1.7661                                       | 0.69             |
| NM_004417 | <i>DUSP1</i>  | Dual specificity phosphatase 1                                 | 2.1864                      | 0.49           | 1.7915          | 0.91             | 2.503                                         | 0.33             |
| NM_001979 | <i>EPHX2</i>  | Epoxide hydrolase 2, cytoplasmic                               | -1.0266                     | 0.55           | 1.7351          | 0.72             | -1.1448                                       | 0.85             |
| NM_000502 | <i>EPX</i>    | Eosinophil peroxidase                                          | 1.2326                      | 0.81           | 2.9288          | 0.13             | 2.456                                         | 0.32             |
| NM_021953 | <i>FOXM1</i>  | Forkhead box M1                                                | 2.1408                      | 0.44           | <b>3.5217</b>   | 0.12             | 2.4957                                        | 0.33             |
| NM_002032 | <i>FTH1</i>   | Ferritin, heavy polypeptide 1                                  | <b>5.9163</b>               | 0.13           | <b>8.4497</b>   | 0.03             | <b>4.3093</b>                                 | 0.20             |
| NM_001498 | <i>GCLC</i>   | Glutamate-cysteine ligase, catalytic subunit                   | 1.3661                      | 0.46           | 1.8373          | 0.15             | -1.3118                                       | 0.67             |
| NM_002061 | <i>GCLM</i>   | Glutamate-cysteine ligase, modifier subunit                    | 2.3032                      | 0.26           | <b>9.737</b>    | <b>&lt;0.001</b> | 2.0801                                        | 0.18             |
| NM_000581 | <i>GPX1</i>   | Glutathione peroxidase 1                                       | 1.6099                      | 0.12           | 1.5006          | 0.20             | 1.4147                                        | 0.34             |
| NM_002083 | <i>GPX2</i>   | Glutathione peroxidase 2 (gastrointestinal)                    | <b>3.2323</b>               | 0.22           | <b>3.0554</b>   | 0.22             | <b>5.5774</b>                                 | <b>&lt;0.05</b>  |
| NM_002084 | <i>GPX3</i>   | Glutathione peroxidase 3 (plasma)                              | 1.7614                      | <b>0.036</b>   | 1.3925          | 0.29             | <b>3.0632</b>                                 | 0.26             |
| NM_002085 | <i>GPX4</i>   | Glutathione peroxidase 4 (phospholipid hydroperoxidase)        | 2.2846                      | 0.55           | 2.5378          | 0.47             | <b>5.5142</b>                                 | 0.31             |
| NM_001509 | <i>GPX5</i>   | Glutathione peroxidase 5 (epididymal androgen-related protein) | -2.849                      | <b>0.013</b>   | <b>-3.0026</b>  | 0.011            | -2.5977                                       | 0.50             |
| NM_182701 | <i>GPX6</i>   | Glutathione peroxidase 6 (olfactory)                           | -2.8681                     | 0.084          | -2.8257         | 0.085            | -2.7885                                       | 0.34             |
| NM_015696 | <i>GPX7</i>   | Glutathione peroxidase 7                                       | 2.0799                      | 0.45           | 2.8148          | 0.11             | 2.5332                                        | 0.32             |
| NM_000637 | <i>GSR</i>    | Glutathione reductase                                          | 1.8274                      | 0.57           | <b>5.5407</b>   | <b>&lt;0.05</b>  | <b>6.3131</b>                                 | <b>&lt;0.01</b>  |
| NM_000178 | <i>GSS</i>    | Glutathione synthetase                                         | 1.4432                      | 0.55           | 2.9867          | <b>0.03</b>      | <b>3.3843</b>                                 | 0.32             |
| NM_000852 | <i>GSTP1</i>  | Glutathione S-transferase pi 1                                 | <b>3.4622</b>               | 0.46           | <b>8.6994</b>   | <b>&lt;0.001</b> | <b>15.9838</b>                                | <b>&lt;0.001</b> |
| NM_001513 | <i>GSTZ1</i>  | Glutathione transferase zeta 1                                 | 1.1629                      | 0.62           | 2.9844          | <b>0.05</b>      | 2.2111                                        | 0.34             |

|           |               |                                                                                       |                |                   |                |               |               |             |
|-----------|---------------|---------------------------------------------------------------------------------------|----------------|-------------------|----------------|---------------|---------------|-------------|
| NM_001518 | <i>GTF2I</i>  | General transcription factor Iii                                                      | 1.0334         | 0.97              | <b>3.2754</b>  | <b>0.032</b>  | 2.3125        | 0.31        |
| NM_002133 | <i>HMOX1</i>  | Heme oxygenase (decycling) 1                                                          | 1.4678         | 0.31              | <b>9.9907</b>  | 0.072         | <b>6.3742</b> | <b>0.05</b> |
| NM_005345 | <i>HSPA1A</i> | Heat shock 70kDa protein 1A                                                           | 1.3499         | 0.43              | <b>4.4116</b>  | <b>0.034</b>  | 2.10          | 0.12        |
| NM_006121 | <i>KRT1</i>   | Keratin 1                                                                             | 1.6194         | 0.47              | 1.5952         | 0.44          | 2.023         | 0.36        |
| NM_006151 | <i>LPO</i>    | Lactoperoxidase                                                                       | 1.1563         | 0.92              | 2.6097         | 0.12          | 2.7078        | 0.33        |
| NM_005368 | <i>MB</i>     | Myoglobin                                                                             | <b>-4.2296</b> | <b>0.026</b>      | <b>-3.9552</b> | <b>0.025</b>  | -1.379        | 0.62        |
| NM_000242 | <i>MBL2</i>   | Mannose-binding lectin (protein C) 2, soluble                                         | <b>-3.3322</b> | 0.34              | -2.3832        | 0.34          | -2.9091       | 0.35        |
| NM_004528 | <i>MGST3</i>  | Microsomal glutathione S-transferase 3                                                | 1.5336         | 0.94              | 1.4235         | 0.96          | 2.6939        | 0.34        |
| NM_000250 | <i>MPO</i>    | Myeloperoxidase                                                                       | -1.0571        | 0.98              | 1.1371         | 0.65          | 2.2895        | 0.32        |
| NM_002437 | <i>MPV17</i>  | MpV17 mitochondrial inner membrane protein                                            | 1.1726         | 0.67              | 1.2307         | 0.55          | 1.5951        | 0.37        |
| NM_012331 | <i>MSRA</i>   | Methionine sulfoxide reductase A                                                      | -1.259         | 0.81              | 1.1616         | 0.76          | 1.0718        | 0.40        |
| NM_005954 | <i>MT3</i>    | Metallothionein 3                                                                     | 1.6406         | 0.38              | -1.8118        | 0.74          | -1.4194       | 0.28        |
| NM_000265 | <i>NCF1</i>   | Neutrophil cytosolic factor 1                                                         | 1.2888         | 0.58              | 1.3073         | 0.33          | 1.2646        | 0.47        |
| NM_000433 | <i>NCF2</i>   | Neutrophil cytosolic factor 2                                                         | 1.1849         | 0.41              | <b>3.159</b>   | <b>0.007</b>  | 2.8046        | 0.27        |
| NM_000625 | <i>NOS2</i>   | Nitric oxide synthase 2, inducible                                                    | 1.1484         | 0.97              | -1.7605        | 0.24          | 1.4365        | 0.41        |
| NM_016931 | <i>NOX4</i>   | NADPH oxidase 4                                                                       | 1.003          | 0.99              | 1.4251         | 0.30          | 1.245         | 0.44        |
| NM_024505 | <i>NOX5</i>   | NADPH oxidase, EF-hand calcium binding domain 5                                       | -1.6054        | 0.12              | -1.2794        | 0.27          | -1.0048       | 0.41        |
| NM_000903 | <i>NQO1</i>   | NAD(P)H dehydrogenase, quinone 1                                                      | <b>-3.3659</b> | 0.078             | 1.3748         | 0.57          | <b>3.2951</b> | 0.28        |
| NM_002452 | <i>NUDT1</i>  | Nudix (nucleoside diphosphate linked moiety X)-type motif 1                           | 1.175          | 0.79              | 1.285          | 0.95          | 1.3635        | 0.63        |
| NM_181354 | <i>OXR1</i>   | Oxidation resistance 1                                                                | 1.4948         | 0.40              | 1.5869         | 0.28          | 2.3281        | 0.32        |
| NM_005109 | <i>OXS1</i>   | Oxidative-stress responsive 1                                                         | -1.0414        | 0.61              | 1.1977         | 0.61          | 2.0056        | 0.34        |
| NM_020992 | <i>PDLIM1</i> | PDZ and LIM domain 1                                                                  | -1.2736        | 0.65              | 1.1662         | 0.67          | 1.5183        | 0.40        |
| NM_007254 | <i>PNKP</i>   | Polynucleotide kinase 3'-phosphatase                                                  | -1.0926        | 0.64              | 1.6981         | 0.13          | 1.5312        | 0.34        |
| NM_002574 | <i>PRDX1</i>  | Peroxiredoxin 1                                                                       | 1.0676         | 0.87              | 1.5026         | 0.30          | 1.8425        | 0.28        |
| NM_005809 | <i>PRDX2</i>  | Peroxiredoxin 2                                                                       | 1.4165         | 0.26              | 2.3535         | 0.04          | 1.9024        | 0.17        |
| NM_006793 | <i>PRDX3</i>  | Peroxiredoxin 3                                                                       | 1.1347         | 0.73              | 2.266          | 0.13          | 1.6317        | 0.38        |
| NM_006406 | <i>PRDX4</i>  | Peroxiredoxin 4                                                                       | 1.3988         | 0.15              | 2.5332         | <b>0.0006</b> | 1.8357        | 0.08        |
| NM_181652 | <i>PRDX5</i>  | Peroxiredoxin 5                                                                       | 1.3844         | 0.25              | 2.5919         | <b>0.0019</b> | 2.2753        | 0.07        |
| NM_004905 | <i>PRDX6</i>  | Peroxiredoxin 6                                                                       | 1.0327         | 0.84              | 1.7842         | 0.43          | 2.4915        | 0.32        |
| NM_020820 | <i>PREX1</i>  | Phosphatidylinositol-3,4,5-trisphosphate-dependent Rac exchange factor 1              | -1.0496        | 0.48              | 1.0177         | 0.66          | 1.4496        | 0.62        |
| NM_183079 | <i>PRNP</i>   | Prion protein                                                                         | -1.4223        | 0.35              | -1.2756        | 0.49          | -1.0444       | 0.49        |
| NM_000962 | <i>PTGS1</i>  | Prostaglandin-endoperoxide synthase 1 (prostaglandin G/H synthase and cyclooxygenase) | -1.4678        | 0.085             | -1.1121        | 0.99          | 1.105         | 0.49        |
| NM_000963 | <i>PTGS2</i>  | Prostaglandin-endoperoxide synthase 2 (prostaglandin G/H synthase and cyclooxygenase) | <b>-3.1546</b> | <b>0.043</b>      | -1.657         | 0.18          | -1.9232       | 0.23        |
| NM_012293 | <i>PXDN</i>   | Peroxidasin homolog (Drosophila)                                                      | 1.2474         | 0.80              | -1.3226        | 0.82          | -1.3178       | 0.60        |
| NM_014245 | <i>RNF7</i>   | Ring finger protein 7                                                                 | -1.2722        | 0.34              | 1.3455         | 0.37          | -1.1987       | 0.66        |
| NM_182826 | <i>SCARA3</i> | Scavenger receptor class A, member 3                                                  | 2.1652         | 0.36              | 2.4605         | 0.30          | 1.2269        | 0.52        |
| NM_203472 | <i>SELS</i>   | Selenoprotein S                                                                       | 1.1293         | 0.62              | 2.4311         | <b>0.018</b>  | 1.2551        | 0.38        |
| NM_005410 | <i>SEPP1</i>  | Selenoprotein P, plasma, 1                                                            | -1.3672        | 0.54              | <b>-3.7941</b> | 0.42          | -1.3966       | 0.69        |
| NM_003019 | <i>SFTPD</i>  | Surfactant protein D                                                                  | -1.1039        | 0.95              | -2.1389        | 0.80          | 2.4943        | 0.31        |
| NM_012237 | <i>SIRT2</i>  | Sirtuin 2                                                                             | 1.6318         | 0.16              | 2.5347         | 0.11          | 2.684         | 0.12        |
| NM_000454 | <i>SOD1</i>   | Superoxide dismutase 1, soluble                                                       | 1.344          | 0.49              | 1.9183         | 0.11          | 1.9282        | 0.27        |
| NM_000636 | <i>SOD2</i>   | Superoxide dismutase 2, mitochondrial                                                 | -1.3283        | 0.32              | -1.3185        | 0.43          | 1.0679        | 0.87        |
| NM_003102 | <i>SOD3</i>   | Superoxide dismutase 3, extracellular                                                 | <b>-5.6173</b> | <b>&lt; 0.001</b> | -1.3981        | 0.87          | -2.5788       | 0.59        |
| NM_003900 | <i>SQSTM1</i> | Sequestosome 1                                                                        | -2.3728        | <b>0.043</b>      | 1.371          | 0.38          | <b>4.6373</b> | 0.26        |

|           |               |                                                      |         |              |                |                  |               |      |
|-----------|---------------|------------------------------------------------------|---------|--------------|----------------|------------------|---------------|------|
| NM_080725 | <i>SRXN1</i>  | Sulfiredoxin 1                                       | -1.8999 | 0.27         | 1.8687         | 0.47             | 2.2622        | 0.27 |
| NM_006374 | <i>STK25</i>  | Serine/threonine kinase 25                           | -1.2861 | 0.32         | 2.2788         | <b>0.029</b>     | 1.1259        | 0.79 |
| NM_000547 | <i>TPO</i>    | Thyroid peroxidase                                   | 1.8106  | 0.35         | 2.3046         | 0.21             | 1.4283        | 0.35 |
| NM_003319 | <i>TTN</i>    | Titin                                                | 1.388   | 0.88         | 2.1973         | 0.31             | 1.2805        | 0.98 |
| NM_003329 | <i>TXN</i>    | Thioredoxin                                          | -1.2295 | 0.49         | <b>3.6591</b>  | <b>&lt;0.001</b> | <b>6.6256</b> | 0.23 |
| NM_003330 | <i>TXNRD1</i> | Thioredoxin reductase 1                              | -1.0954 | 0.53         | <b>-11.085</b> | 0.99             | 1.8225        | 0.61 |
| NM_006440 | <i>TXNRD2</i> | Thioredoxin reductase 2                              | 1.6792  | 0.92         | 2.9196         | 0.56             | 2.7332        | 0.43 |
| NM_003355 | <i>UCP2</i>   | Uncoupling protein 2 (mitochondrial, proton carrier) | 2.4417  | <b>0.038</b> | <b>6.6794</b>  | <b>&lt;0.001</b> | <b>5.0742</b> | 0.10 |

<sup>a</sup> Modulation of gene expression was measured after 3 days of incubation with 32 µg/mL of Sb<sup>v</sup> using the RT<sup>2</sup> Human Oxidative Stress PCR expression array analysis (QIAGEN). Data are represented as fold change and mean ± S:E:M

Supplementary Table S3. Modulation of drug transporters gene expression levels in human MDMs cells by *L. braziliensis* infection and Glucantime® (Sb<sup>V</sup>)<sup>a</sup> treatment.

| Refseq    | Symbol             | Description Drug Transporters                            | Fold change gene expression |         |                 |         |                                            |         |
|-----------|--------------------|----------------------------------------------------------|-----------------------------|---------|-----------------|---------|--------------------------------------------|---------|
|           |                    |                                                          | <i>L. braziliensis</i>      | p value | Sb <sup>V</sup> | p value | <i>L. braziliensis</i> and Sb <sup>V</sup> | p value |
| NM_005502 | <i>ABCA1</i>       | ATP-binding cassette, sub-family A (ABC1), member 1      | 2.7882                      | 0.38    | -               | 0.51    | 6.0721                                     | 0.24    |
| NM_173076 | <i>ABCA12</i>      | ATP-binding cassette, sub-family A (ABC1), member 12     | 1.2124                      | 0.44    | 1.4417          | 0.37    | 1.5115                                     | 0.25    |
| NM_152701 | <i>ABCA13</i>      | ATP-binding cassette, sub-family A (ABC1), member 13     | 1.6592                      | 0.93    | 2.0333          | 0.41    | 2.5366                                     | 0.36    |
| NM_001606 | <i>ABCA2</i>       | ATP-binding cassette, sub-family A (ABC1), member 2      | 1.2663                      | 0.30    | 2.1881          | 0.71    | 4.9661                                     | 0.34    |
| NM_001089 | <i>ABCA3</i>       | ATP-binding cassette, sub-family A (ABC1), member 3      | 1.2887                      | 0.52    | 1.5093          | 0.89    | 2.3793                                     | 0.37    |
| NM_000350 | <i>ABCA4</i>       | ATP-binding cassette, sub-family A (ABC1), member 4      | 1.2334                      | 0.39    | 1.5156          | 0.36    | 2.2194                                     | 0.32    |
| NM_018672 | <i>ABCA5</i>       | ATP-binding cassette, sub-family A (ABC1), member 5      | 1.5198                      | 0.50    | 2.0152          | 0.89    | 1.3186                                     | 0.59    |
| NM_080283 | <i>ABCA9</i>       | ATP-binding cassette, sub-family A (ABC1), member 9      | 1.7557                      | 0.25    | 1.5586          | 0.39    | 2.5727                                     | 0.21    |
| NM_000927 | <i>ABCB1/PGP</i>   | ATP-binding cassette, sub-family B (MDR/TAP), member 1   | 1.0709                      | 0.42    | -               | 0.75    | 1.3397                                     | 0.78    |
| NM_003742 | <i>ABCB11/BSEP</i> | ATP-binding cassette, sub-family B (MDR/TAP), member 11  | 1.8299                      | 0.90    | 9.5751          | <0,001  | 5.2472                                     | 0.25    |
| NM_000443 | <i>ABCB4</i>       | ATP-binding cassette, sub-family B (MDR/TAP), member 4   | 1.752                       | 0.55    | 1.4065          | 0.86    | 1.3751                                     | 0.54    |
| NM_178559 | <i>ABCB5</i>       | ATP-binding cassette, sub-family B (MDR/TAP), member 5   | 17.0634                     | <0,001  | 8.8499          | <0,001  | 13.8963                                    | <0,001  |
| NM_005689 | <i>ABCB6</i>       | ATP-binding cassette, sub-family B (MDR/TAP), member 6   | 3.3862                      | 0.48    | 4.795           | 0.14    | 10.1194                                    | <0,001  |
| NM_004996 | <i>ABCC1</i>       | ATP-binding cassette, sub-family C (CFTR/MRP), member 1  | 1.0506                      | 0.88    | 1.1613          | 0.95    | 2.1409                                     | 0.35    |
| NM_033450 | <i>ABCC10</i>      | ATP-binding cassette, sub-family C (CFTR/MRP), member 10 | -2.0837                     | 0.22    | 1.4739          | 0.92    | 1.7027                                     | 0.43    |
| NM_032583 | <i>ABCC11</i>      | ATP-binding cassette, sub-family C (CFTR/MRP), member 11 | -2.6092                     | 0.33    | 2.0677          | 0.84    | 3.1774                                     | 0.44    |
| NM_033226 | <i>ABCC12</i>      | ATP-binding cassette, sub-family C (CFTR/MRP), member 12 | 1.6172                      | 0.39    | 3.637           | 0.25    | 2.952                                      | 0.04    |
| NM_000392 | <i>ABCC2</i>       | ATP-binding cassette, sub-family C (CFTR/MRP), member 2  | 1.0925                      | 0.63    | 1.1162          | 0.67    | 2.3375                                     | 0.45    |
| NM_003786 | <i>ABCC3</i>       | ATP-binding cassette, sub-family C (CFTR/MRP), member 3  | 1.1527                      | 0.73    | 1.1234          | 0.71    | 1.8241                                     | 0.34    |
| NM_005845 | <i>ABCC4</i>       | ATP-binding cassette, sub-family C (CFTR/MRP), member 4  | -1.0153                     | 0.59    | 1.0319          | 0.69    | 1.761                                      | 0.45    |
| NM_005688 | <i>ABCC5</i>       | ATP-binding cassette, sub-family C (CFTR/MRP), member 5  | 1.4657                      | 0.95    | 1.4338          | 0.60    | 2.9503                                     | 0.27    |
| NM_000033 | <i>ABCD1</i>       | ATP-binding cassette, sub-family D (ALD), member 1       | -1.0815                     | 0.47    | 2.1793          | 0.31    | 1.7251                                     | 0.41    |
| NM_002858 | <i>ABCD3</i>       | ATP-binding cassette, sub-family D (ALD), member 3       | 1.7856                      | 0.33    | 1.734           | 0.52    | 1.9456                                     | 0.34    |

|           |                     |                                                                            |         |      |        |             |        |              |      |
|-----------|---------------------|----------------------------------------------------------------------------|---------|------|--------|-------------|--------|--------------|------|
| NM_005050 | <i>ABCD4</i>        | ATP-binding cassette, sub-family D (ALD), member 4                         | 19.7497 | 0.35 | 3.5205 | 0.57        | 2.393  | 0.87         |      |
| NM_001090 | <i>ABCF1</i>        | ATP-binding cassette, sub-family F (GCN20), member 1                       | 2.7232  | 0.44 | -      | 1.0142      | 0.68   | 2.7466       | 0.40 |
| NM_004827 | <i>ABCG2/BCRP</i>   | ATP-binding cassette, sub-family G (WHITE), member 2                       | -1.2278 | 0.30 | 1.3645 | 0.30        | 2.2644 | <b>0.005</b> |      |
| NM_022437 | <i>ABCG8</i>        | ATP-binding cassette, sub-family G (WHITE), member 8                       | -2.3154 | 0.14 | -      | 1.5256      | 0.28   | -1.3179      | 0.50 |
| NM_198098 | <i>AQP1</i>         | Aquaporin 1 (Colton blood group)                                           | 1.997   | 0.39 | 3.7719 | 0.16        | 4.8047 | 0.12         |      |
| NM_001170 | <i>AQP7</i>         | Aquaporin 7                                                                | 1.6601  | 0.37 | 2.6159 | 0.28        | 4.5497 | 0.20         |      |
| NM_020980 | <i>AQP9</i>         | Aquaporin 9                                                                | 1.0335  | 0.75 | 1.4472 | 0.45        | 1.6963 | 0.40         |      |
| NM_001694 | <i>ATP6V0C</i>      | ATPase, H+ transporting, lysosomal 16kDa, V0 subunit c                     | -1.0566 | 0.94 | -      | 1.2204      | 0.84   | 1.3498       | 0.31 |
| NM_000052 | <i>ATP7A</i>        | ATPase, Cu++ transporting, alpha polypeptide                               | -1.3336 | 0.51 | -      | 1.1477      | 0.84   | 1.2083       | 0.46 |
| NM_000053 | <i>ATP7B</i>        | ATPase, Cu++ transporting, beta polypeptide                                | -1.0339 | 0.83 | 2.2603 | 0.39        | 2.2512 | 0.35         |      |
| NM_017458 | <i>MVP</i>          | Major vault protein                                                        | -1.0625 | 0.66 | 1.6415 | 0.68        | 1.9275 | 0.35         |      |
| NM_003049 | <i>SLC10A1</i>      | Solute carrier family 10 (sodium/bile acid cotransporter family), member 1 | 2.2255  | 0.18 | 1.1896 | 0.40        | 4.3593 | <b>0.04</b>  |      |
| NM_000452 | <i>SLC10A2</i>      | Solute carrier family 10 (sodium/bile acid cotransporter family), member 2 | 1.0248  | 0.94 | 4.6554 | 0.17        | 3.3093 | 0.24         |      |
| NM_005073 | <i>SLC15A1</i>      | Solute carrier family 15 (oligopeptide transporter), member 1              | -1.3637 | 0.29 | 2.4727 | 0.13        | 2.4577 | 0.17         |      |
| NM_021082 | <i>SLC15A2</i>      | Solute carrier family 15 (H+/peptide transporter), member 2                | -1.4179 | 0.32 | 1.59   | 0.25        | 1.632  | 0.22         |      |
| NM_003051 | <i>SLC16A1</i>      | Solute carrier family 16, member 1 (monocarboxylic acid transporter 1)     | -1.3368 | 0.73 | -1.059 | 0.95        | 1.3932 | 0.94         |      |
| NM_006517 | <i>SLC16A2</i>      | Solute carrier family 16, member 2 (monocarboxylic acid transporter 8)     | 1.1281  | 0.74 | 1.3588 | 0.47        | 1.814  | 0.42         |      |
| NM_004207 | <i>SLC16A3</i>      | Solute carrier family 16, member 3 (monocarboxylic acid transporter 4)     | -1.12   | 0.64 | 2.5082 | <b>0.02</b> | 3.2376 | 0.099        |      |
| NM_194255 | <i>SLC19A1</i>      | Solute carrier family 19 (folate transporter), member 1                    | -1.1381 | 0.88 | 1.2764 | 0.66        | 1.4809 | 0.39         |      |
| NM_006996 | <i>SLC19A2</i>      | Solute carrier family 19 (thiamine transporter), member 2                  | 1.2952  | 0.38 | 2.9151 | 0.074       | 2.0503 | 0.06         |      |
| NM_025243 | <i>SLC19A3</i>      | Solute carrier family 19, member 3                                         | 1.0728  | 0.88 | 1.9823 | 0.26        | 1.7264 | 0.36         |      |
| NM_003057 | <i>SLC22A1/OCT1</i> | Solute carrier family 22 (organic cation transporter), member 1            | 2.5649  | 0.09 | 1.5658 | 0.17        | 4.5953 | 0.16         |      |
| NM_003058 | <i>SLC22A2/OCT2</i> | Solute carrier family 22 (organic cation transporter), member 2            | -1.0497 | 0.58 | -      | 1.0436      | 0.89   | 1.1259       | 0.49 |
| NM_021977 | <i>SLC22A3</i>      | Solute carrier family 22 (extraneuronal monoamine transporter), member 3   | 1.1381  | 0.91 | 1.8145 | 0.29        | 1.8979 | 0.27         |      |
| NM_004790 | <i>SLC22A6</i>      | Solute carrier family 22 (organic anion transporter), member 6             | 1.4323  | 0.45 | 1.9293 | 0.32        | 3.0695 | 0.30         |      |
| NM_006672 | <i>SLC22A7</i>      | Solute carrier family 22 (organic anion transporter), member 7             | -1.4221 | 0.27 | -1.07  | 0.42        | 1.8342 | 0.45         |      |
| NM_004254 | <i>SLC22A8</i>      | Solute carrier family 22 (organic anion transporter), member 8             | -1.2561 | 0.67 | 1.4076 | 0.46        | 2.6641 | 0.19         |      |
| NM_080866 | <i>SLC22A9</i>      | Solute carrier family 22 (organic anion transporter), member 9             | 1.1509  | 0.10 | 1.9423 | 0.21        | 2.489  | 0.07         |      |
| NM_014251 | <i>SLC25A13</i>     | Solute carrier family 25, member 13 (citrin)                               | 1.0622  | 0.59 | 1.2905 | 0.16        | 1.5898 | 0.32         |      |

|           |                     |                                                                                                                                                          |         |      |        |      |         |       |
|-----------|---------------------|----------------------------------------------------------------------------------------------------------------------------------------------------------|---------|------|--------|------|---------|-------|
| NM_004213 | SLC28A1             | Solute carrier family 28 (sodium-coupled nucleoside transporter), member 1                                                                               | 1.7294  | 0.87 | 1.9761 | 0.32 | 5.1152  | 0.189 |
| NM_004212 | SLC28A2             | Solute carrier family 28 (sodium-coupled nucleoside transporter), member 2                                                                               | -1.639  | 0.65 | 1.2693 | 0.60 | -1.1724 | 0.47  |
| NM_022127 | SLC28A3             | Solute carrier family 28 (sodium-coupled nucleoside transporter), member 3                                                                               | -1.6493 | 0.67 | 1.1962 | 0.49 | -1.3013 | 0.89  |
| NM_004955 | SLC29A1             | Solute carrier family 29 (nucleoside transporters), member 1                                                                                             | 1.1007  | 0.87 | 1.4824 | 0.45 | 1.8015  | 0.26  |
| NM_001532 | SLC29A2             | Solute carrier family 29 (nucleoside transporters), member 2                                                                                             | 1.0231  | 0.70 | 2.362  | 0.22 | 2.256   | 0.28  |
| NM_006516 | SLC2A1              | Solute carrier family 2 (facilitated glucose transporter), member 1                                                                                      | 1.9482  | 0.25 | 1.4985 | 0.62 | 2.2889  | 0.31  |
| NM_000340 | SLC2A2              | Solute carrier family 2 (facilitated glucose transporter), member 2                                                                                      | -1.1387 | 0.49 | 1.5713 | 0.33 | 2.0765  | 0.14  |
| NM_006931 | SLC2A3              | Solute carrier family 2 (facilitated glucose transporter), member 3                                                                                      | -1.1478 | 0.10 | 1.1963 | 0.59 | 1.5309  | 0.36  |
| NM_001859 | SLC31A1             | Solute carrier family 31 (copper transporters), member 1                                                                                                 | -1.4639 | 0.28 | 1.4811 | 0.50 | 1.689   | 0.41  |
| NM_018976 | SLC38A2             | Solute carrier family 38, member 2                                                                                                                       | -1.3534 | 0.32 | -1.005 | 0.10 | -1.1358 | 0.90  |
| NM_033518 | SLC38A5             | Solute carrier family 38, member 5                                                                                                                       | 1.1475  | 0.92 | 1.2243 | 0.94 | 1.7964  | 0.33  |
| NM_000341 | SLC3A1              | Solute carrier family 3 (cystine, dibasic and neutral amino acid transporters, activator of cystine, dibasic and neutral amino acid transport), member 1 | -1.585  | 0.39 | 1.0462 | 0.81 | 1.0633  | 0.44  |
| NM_002394 | SLC3A2              | Solute carrier family 3 (activators of dibasic and neutral amino acid transport), member 2                                                               | -1.0275 | 0.91 | 1.2543 | 0.33 | 2.0758  | 0.11  |
| NM_000343 | SLC5A1              | Solute carrier family 5 (sodium/glucose cotransporter), member 1                                                                                         | -1.3023 | 0.51 | 1.5097 | 0.63 | 2.5716  | 0.75  |
| NM_014227 | SLC5A4              | Solute carrier family 5 (low affinity glucose cotransporter), member 4                                                                                   | 1.1371  | 0.99 | 1.8769 | 0.37 | 1.4851  | 0.54  |
| NM_014331 | SLC7A11             | Solute carrier family 7 (anionic amino acid transporter light chain, xc- system), member 11                                                              | 1.951   | 0.26 | 2.3558 | 0.14 | 5.3677  | 0.13  |
| NM_003486 | SLC7A5              | Solute carrier family 7 (amino acid transporter light chain, L system), member 5                                                                         | -1.1129 | 0.80 | 1.1322 | 0.65 | 1.5785  | 0.22  |
| NM_003983 | SLC7A6              | Solute carrier family 7 (amino acid transporter light chain, y+L system), member 6                                                                       | 1.3     | 0.83 | 1.1632 | 0.89 | 1.4166  | 0.62  |
| NM_003982 | SLC7A7              | Solute carrier family 7 (amino acid transporter light chain, y+L system), member 7                                                                       | 1.4153  | 0.39 | 1.4727 | 0.32 | 1.6238  | 0.30  |
| NM_182728 | SLC7A8              | Solute carrier family 7 (amino acid transporter light chain, L system), member 8                                                                         | 1.4066  | 0.70 | 3.0578 | 0.05 | 2.6496  | 0.22  |
| NM_014270 | SLC7A9              | Solute carrier family 7 (glycoprotein-associated amino acid transporter light chain, bo,+ system), member 9                                              | -1.1469 | 0.65 | 1.6963 | 0.89 | 1.731   | 0.76  |
| NM_021094 | SLCO1A2             | Solute carrier organic anion transporter family, member 1A2                                                                                              | -1.0442 | 0.93 | 1.2662 | 0.99 | 2.8988  | 0.16  |
| NM_006446 | SLCO1B1/<br>OATP1B1 | Solute carrier organic anion transporter family, member 1B1                                                                                              | -1.3877 | 0.30 | 1.1257 | 0.77 | 1.647   | 0.43  |
| NM_019844 | SLCO1B3/<br>OATP1B3 | Solute carrier organic anion transporter family, member 1B3                                                                                              | 1.3578  | 0.51 | 1.5161 | 0.45 | 1.8029  | 0.35  |
| NM_005630 | SLCO2A1             | Solute carrier organic anion transporter family, member 2A1                                                                                              | 1.5173  | 0.30 | 4.5364 | 0.10 | 2.5803  | 0.06  |

|           |                |                                                             |         |      |        |        |        |        |      |
|-----------|----------------|-------------------------------------------------------------|---------|------|--------|--------|--------|--------|------|
| NM_007256 | <i>SLCO2B1</i> | Solute carrier organic anion transporter family, member 2B1 | -1.0372 | 0.66 | 1.2573 | 0.94   | 2.0468 | 0.26   |      |
| NM_013272 | <i>SLCO3A1</i> | Solute carrier organic anion transporter family, member 3A1 | -1.5625 | 0.22 | -      | 1.2381 | 0.40   | 1.0574 | 0.96 |
| NM_016354 | <i>SLCO4A1</i> | Solute carrier organic anion transporter family, member 4A1 | 1.9763  | 0.24 | 2.4582 | 0.16   | 2.6362 | 0.26   |      |
| NM_000593 | <i>TAP1</i>    | Transporter 1, ATP-binding cassette, sub-family B (MDR/TAP) | 1.1781  | 0.99 | 1.1559 | 0.76   | 1.5873 | 0.93   |      |
| NM_000544 | <i>TAP2</i>    | Transporter 2, ATP-binding cassette, sub-family B (MDR/TAP) | 1.1559  | 0.92 | 1.7514 | 0.23   | 2.4777 | 0.13   |      |
| NM_003374 | <i>VDAC1</i>   | Voltage-dependent anion channel 1                           | 1.6296  | 0.45 | 2.2844 | 0.08   | 1.9606 | 0.28   |      |
| NM_003375 | <i>VDAC2</i>   | Voltage-dependent anion channel 2                           | 1.2376  | 0.85 | 2.0892 | 0.19   | 2.2265 | 0.18   |      |

<sup>a</sup> Modulation of gene expression was measured after 3 days of incubation with 32 µg/mL of Sb<sup>V</sup> using the RT<sup>2</sup> Human Drug Transporters PCR expression array analysis (QIAGEN). Data are represented as fold change and mean ± S:E:M
